# Supplementary material for: The Associations of Caesarean Delivery With Risk of Wheezing Diseases and Changes of T Cells in Children
Source: PubMed Central journal article supplement (PMC8712489; doi:10.3389/fimmu.2021.793762), 2021-12-14
Supplement: DataSheet_1.pdf [file DataSheet_1.pdf]

**Table S1: the detailed information about the estimate effects of caesarean delivery on asthma or first episode of wheezing**

|                           | Time point (years) | N    | Crude OR (95% CI)        | Adjusted OR (95% CI)     | Crude HR (95% CI)         | Adjusted HR (95% CI)      |
|---------------------------|--------------------|------|--------------------------|--------------------------|---------------------------|---------------------------|
| First episode of wheezing | 0~1                | 1373 | <b>1.38 (1.02, 1.86)</b> | 1.3 (0.96, 1.77)         | <b>1.34 (1.02, 1.77)</b>  | 1.27 (0.96, 1.68)         |
|                           | 0~2                | 1035 | <b>1.45 (1.06, 1.98)</b> | <b>1.37 (1.01, 1.88)</b> | <b>1.39 (1.05, 1.83)</b>  | 1.31 (0.98, 1.74)         |
|                           | 0~3                | 800  | <b>1.57 (1.12, 2.21)</b> | <b>1.5 (1.06, 2.12)</b>  | <b>1.47 (1.09, 1.99)</b>  | <b>1.4 (1.03, 1.90)</b>   |
|                           | 0~4                | 540  | 1.44 (0.97, 2.16)        | 1.42 (0.94, 2.13)        | 1.39 (0.98, 1.98)         | 1.35 (0.94, 1.92)         |
|                           | 0~5                | 374  | 1.52 (0.93, 2.5)         | 1.5 (0.92, 2.49)         | 1.47 (0.95, 2.28)         | 1.44 (0.93, 2.24)         |
|                           | 0~6                | 302  | 1.3 (0.75, 2.24)         | 1.28 (0.74, 2.22)        | 1.29 (0.8, 2.08)          | 1.27 (0.78, 2.05)         |
| Asthma                    | 0~3                | 797  | <b>3.64 (1.25, 13.1)</b> | <b>3.9 (1.33, 14.18)</b> | <b>3.59 (1.16, 11.14)</b> | <b>3.82 (1.22, 11.94)</b> |
|                           | 0~4                | 537  | <b>3.16 (1.26, 8.97)</b> | <b>3.16 (1.25, 9.01)</b> | <b>3.08 (1.20, 7.95)</b>  | <b>3.07 (1.19, 7.95)</b>  |
|                           | 0~5                | 371  | 1.62 (0.66, 3.96)        | 1.52 (0.62, 3.75)        | 1.62 (0.66, 3.96)         | 1.52 (0.62, 3.75)         |
|                           | 0~6                | 299  | 1.23 (0.43, 3.58)        | 1.15 (0.39, 3.42)        | 1.23 (0.45, 3.39)         | 1.13 (0.41, 3.14)         |

N: Number of sample size; OR: Odds ratio; HR: hazard ratios;

Adjusted: Models were adjusted for premature or full-term delivery and breastfeeding status.

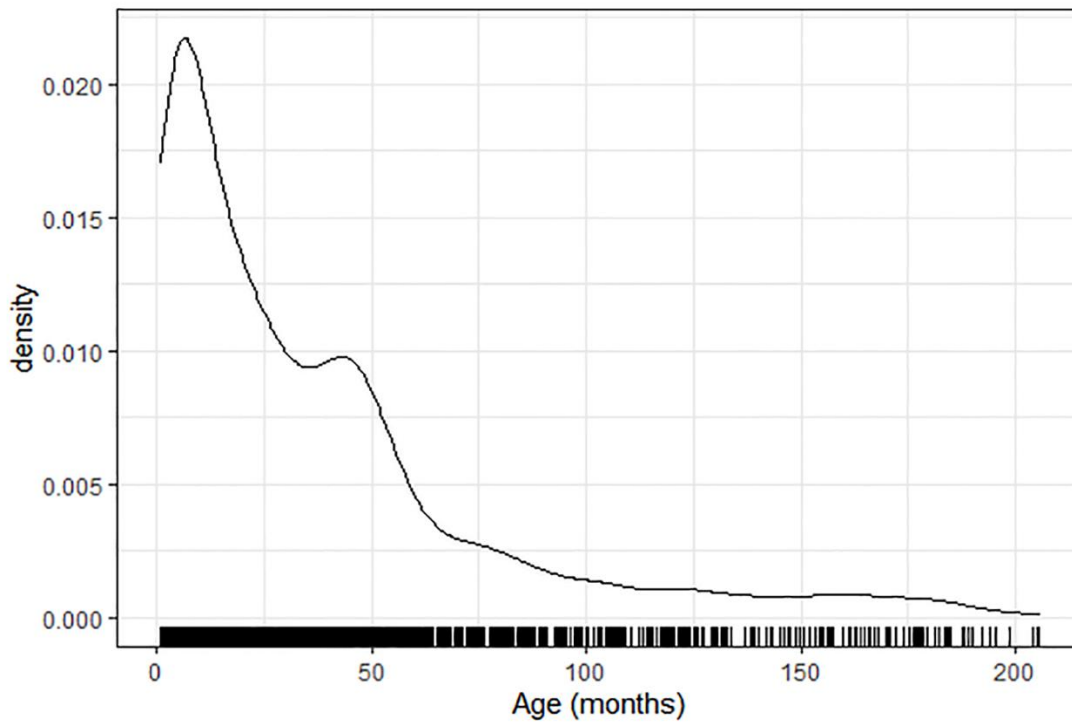

**Figure S1:** the distribution of age of all children.

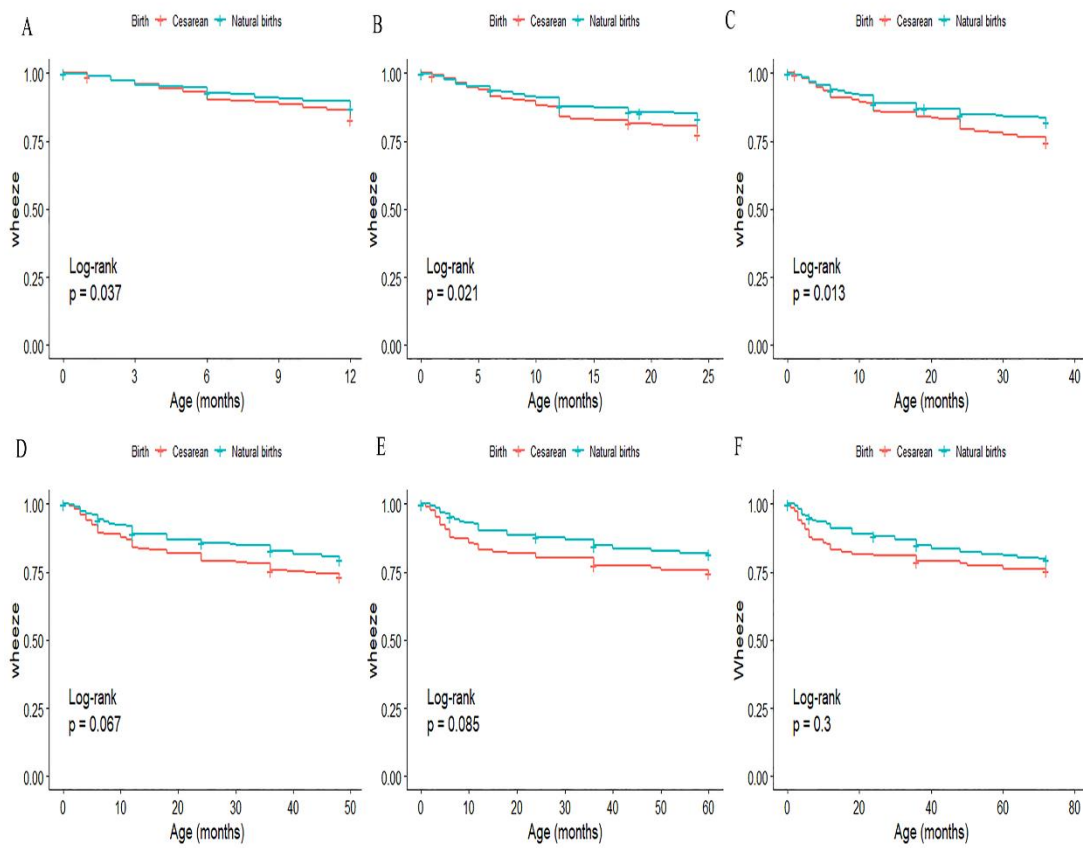

**Figure S2:** The effects on the development of FEW was assessed by Kaplan–Meier curves and quantified by means of Cox proportional hazards regression (P values correspond to Wald tests). A: in first 1 year; B: in first 2 year; C: in first 3 year; D: in first 4 year; E: in first 5 year; F in first 6 year.

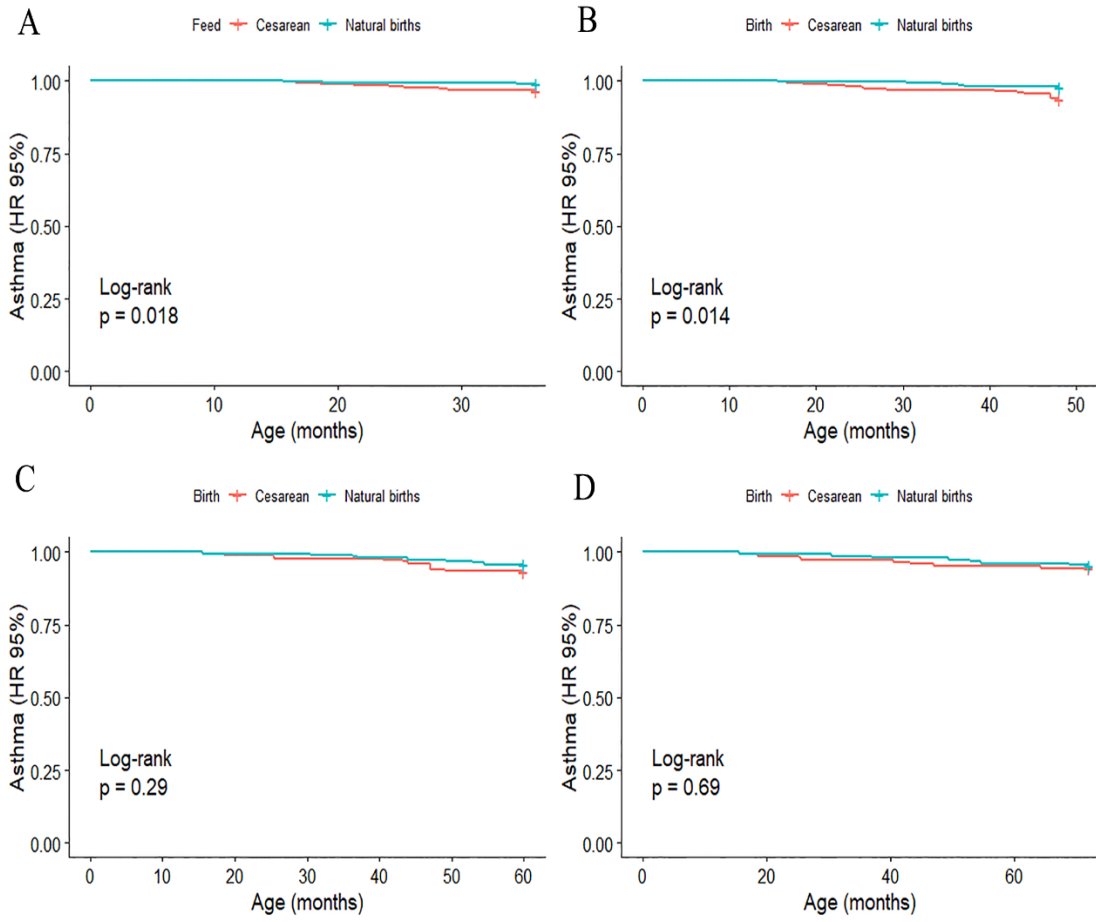

**Figure S3:** The effects on the development of asthma was assessed by Kaplan–Meier curves and quantified by means of Cox proportional hazards regression (P values correspond to Wald tests). A: in first 3 year; B: in first 4 year; C: in first 5 year; D: in first 6 year.

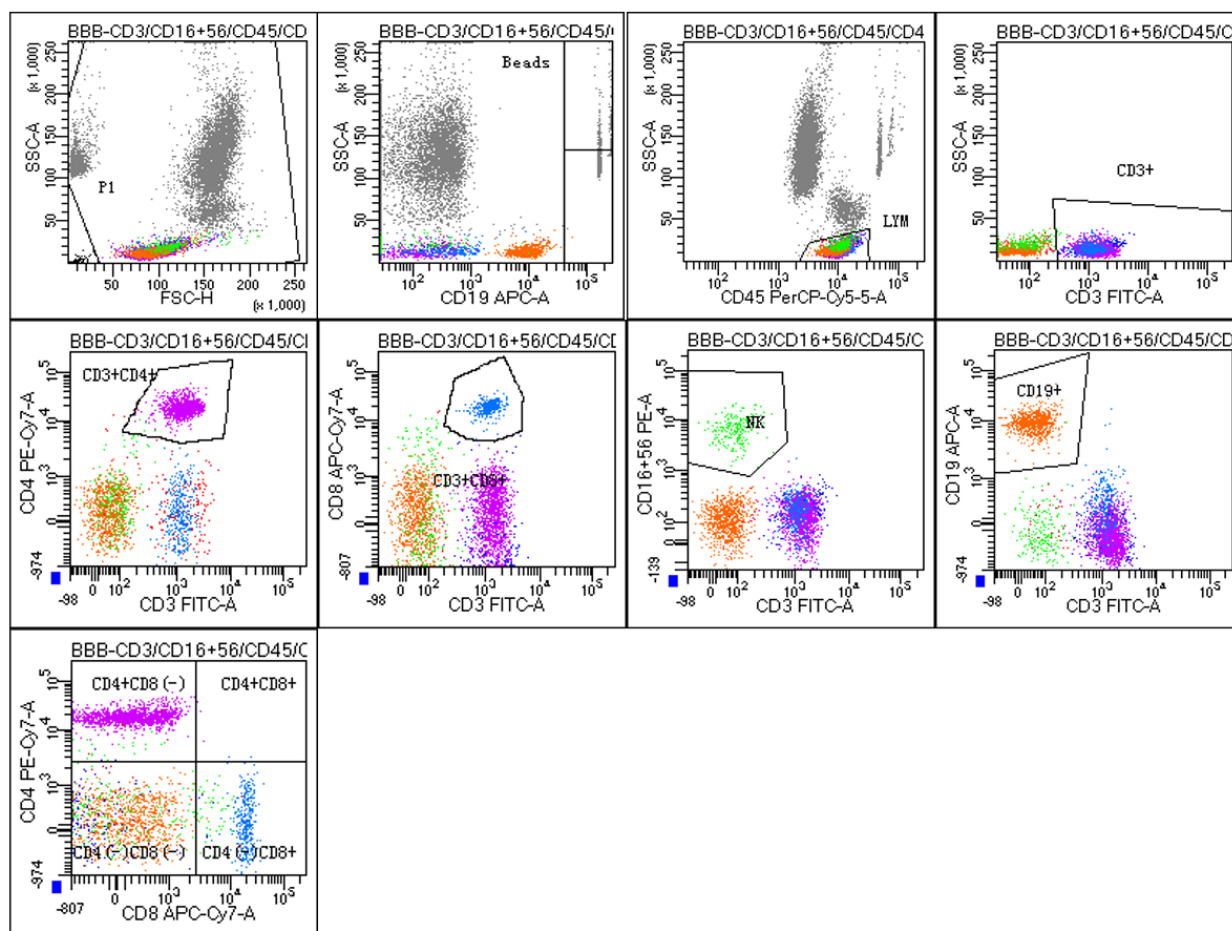

**Figure S4:** The flow cytometry of immune cells in children. BD Multitest™ 6-color TBNK reagent (<https://www.bdbiosciences.com/zh-cn>) was used for flow cytometry (FC) of TBNK (T cells, B cells and NK cells, cells/ $\mu$ l). It contains FITC-labeled CD3, clone SK7; PE-labeled CD16, clone B73.1, and CD56, clone NCAM16.2; PerCP-Cy™5.5†-labeled CD45, clone 2D1 (HLe-1); PE-Cy™7-labeled CD4, clone SK3; APC-labeled CD19, clone SJ25C1; and APC-Cy7‡-labeled CD8, clone SK1. The absolute number (cells/ $\mu$ L) of positive cells in the sample can be determined by comparing cellular events to bead events. Absolute counts of cells are calculated by BD FACSCanto clinical software using the following formula: cell population absolute count test volume = (events in cell population/events in absolute count bead region)\*(beads of each test/ test volume).

**Table S2: the changes of immune cells between VD and CD group in different ages**

| Age (years) | Test of immune cells | VD  |                  | CD  |                  | P     |
|-------------|----------------------|-----|------------------|-----|------------------|-------|
|             |                      | N   | Values           | N   | Values           |       |
| <=1         | CD3+                 | 285 | 4296.43 ±2404.72 | 285 | 4210.04 ±2575.82 | 0.68  |
|             | CD3+%                | 285 | 61.92 ±10        | 285 | 63.22 ±10.47     | 0.13  |
|             | CD3+CD4+             | 285 | 2709.55 ±1448.23 | 285 | 2730.23 ±1229.15 | 0.85  |
|             | CD3+CD4+%            | 285 | 39.44 ±9.99      | 285 | 42.32 ±10.4      | <0.01 |
|             | CD3+CD8+             | 285 | 1411.55 ±1120.13 | 285 | 1311.94 ±1795.2  | 0.43  |
|             | CD3+CD8+%            | 285 | 19.88 ±7.64      | 285 | 18.31 ±7.48      | 0.01  |
|             | CD4/CD8              | 285 | 2.35 ±1.24       | 285 | 2.78 ±1.71       | <0.01 |
|             | CD3+/HLA-DR+         | 222 | 413.62 ±565.25   | 225 | 468.7 ±1662.53   | 0.64  |
|             | CD3+/HLA-DR+%        | 222 | 5.9 ±7.23        | 225 | 5.85 ±9.33       | 0.95  |
|             | Treg                 | 228 | 185.82 ±109.66   | 229 | 187.03 ±94       | 0.9   |
|             | Treg%                | 228 | 2.78 ±1.14       | 229 | 5.89 ±27.41      | 0.09  |
|             | CD3-/CD19+           | 285 | 1655.2 ±1031.89  | 285 | 1490.67 ±909.17  | 0.04  |
|             | CD3-/CD19+%          | 285 | 23.98 ±9.71      | 285 | 23.25 ±9.8       | 0.37  |
|             | CD45+                | 285 | 6954.4 ±3741.5   | 285 | 6591.21 ±3476.99 | 0.23  |
|             | NK                   | 285 | 905.76 ±843.73   | 285 | 807.77 ±590.27   | 0.11  |
|             | NK%                  | 285 | 12.7 ±7.54       | 285 | 12.26 ±6.34      | 0.45  |
|             | CD14+/HLA-DR+        | 223 | 1053.99 ±1045.35 | 226 | 1011.53 ±683.16  | 0.61  |
|             | CD14+/HLA-DR+%       | 223 | 86.61 ±56.5      | 226 | 82.43 ±18.45     | 0.29  |
| 1~2         | CD3+                 | 149 | 3525.06 ±2122.82 | 132 | 3445.65 ±2800.43 | 0.79  |
|             | CD3+%                | 149 | 60.81 ±11.82     | 132 | 59.02 ±12.79     | 0.23  |
|             | CD3+CD4+             | 149 | 2029.22 ±1230.33 | 132 | 1777.88 ±1159.99 | 0.08  |
|             | CD3+CD4+%            | 149 | 35.29 ±10.04     | 132 | 32.98 ±9.93      | 0.05  |
|             | CD3+CD8+             | 149 | 1230.47 ±1028.16 | 132 | 1423.72 ±1818.7  | 0.28  |
|             | CD3+CD8+%            | 149 | 20.85 ±8.45      | 132 | 21.91 ±10.44     | 0.35  |
|             | CD4/CD8              | 149 | 1.99 ±1.05       | 132 | 1.85 ±1          | 0.25  |
|             | CD3+/HLA-DR+         | 118 | 397.32 ±810.58   | 107 | 479.97 ±1055.61  | 0.51  |
|             | CD3+/HLA-DR+%        | 118 | 6.13 ±6.67       | 107 | 6.4 ±7.5         | 0.77  |
|             | Treg                 | 120 | 135.71 ±93.99    | 108 | 128.54 ±91.54    | 0.56  |
|             | Treg%                | 120 | 2.44 ±1.09       | 108 | 2.4 ±1.2         | 0.81  |
|             | CD3-/CD19+           | 149 | 1416.43 ±912.58  | 132 | 1430.22 ±992.82  | 0.9   |
|             | CD3-/CD19+%          | 149 | 25.16 ±10.3      | 132 | 27.92 ±12.95     | 0.05  |
|             | CD45+                | 149 | 5728.41 ±3083.25 | 132 | 5456.22 ±3653.48 | 0.5   |
|             | NK                   | 149 | 712.89 ±565.06   | 132 | 613.07 ±475.27   | 0.11  |
|             | NK%                  | 149 | 12.8 ±9.32       | 132 | 11.42 ±6.1       | 0.14  |
|             | CD14+/HLA-DR+        | 119 | 953.16 ±618.03   | 107 | 867.5 ±619.05    | 0.3   |
|             | CD14+/HLA-DR+%       | 119 | 84.08 ±18.92     | 107 | 87.49 ±40.73     | 0.43  |
| 2~3         | CD3+                 | 111 | 3447.72 ±3476.26 | 86  | 3440.98 ±2729.59 | 0.99  |
|             | CD3+%                | 111 | 63.6 ±12.07      | 86  | 62.72 ±12.37     | 0.62  |
|             | CD3+CD4+             | 111 | 1546.62 ±795.08  | 86  | 1620.31 ±1019.01 | 0.58  |
|             | CD3+CD4+%            | 111 | 33.38 ±10.47     | 86  | 32.57 ±9.61      | 0.58  |

|                |     |                  |    |                  |      |
|----------------|-----|------------------|----|------------------|------|
| CD3+CD8+       | 111 | 1618.94 ±3026.34 | 86 | 1512.16 ±2110.83 | 0.77 |
| CD3+CD8+%      | 111 | 24.65 ±13.66     | 86 | 23.96 ±13.6      | 0.73 |
| CD4/CD8        | 111 | 1.73 ±0.95       | 86 | 1.7 ±0.86        | 0.82 |
| CD3+/HLA-DR+   | 89  | 936.05 ±3058.31  | 74 | 690.63 ±1718.83  | 0.52 |
| CD3+/HLA-DR+%  | 89  | 8.55 ±13.71      | 74 | 9.32 ±13.86      | 0.72 |
| Treg           | 93  | 115.27 ±96.84    | 75 | 127.31 ±114.42   | 0.47 |
| Treg%          | 93  | 7.95 ±53.37      | 75 | 2.47 ±1.02       | 0.32 |
| CD3-/CD19+     | 111 | 1064.12 ±703.01  | 86 | 1052.63 ±654.04  | 0.91 |
| CD3-/CD19+%    | 111 | 23.84 ±10.98     | 86 | 23.44 ±11.22     | 0.8  |
| CD45+          | 111 | 5173.76 ±4122.84 | 86 | 5177.58 ±3266.03 | 0.99 |
| NK             | 111 | 587.26 ±558.46   | 86 | 614.21 ±500.53   | 0.72 |
| NK%            | 111 | 11.37 ±6.6       | 86 | 12.46 ±7.49      | 0.29 |
| CD14+/HLA-DR+  | 89  | 836.35 ±585.37   | 74 | 838.89 ±552.77   | 0.98 |
| CD14+/HLA-DR+% | 89  | 86.92 ±15.21     | 74 | 86.56 ±15.8      | 0.88 |

|                |     |                  |     |                  |      |
|----------------|-----|------------------|-----|------------------|------|
| CD3+           | 114 | 3218.33 ±4375.94 | 106 | 2464.69 ±2354.24 | 0.11 |
| CD3+%          | 114 | 65.57 ±10.45     | 106 | 62.04 ±11.63     | 0.02 |
| CD3+CD4+       | 114 | 1308.25 ±657.97  | 106 | 1140.97 ±676.21  | 0.06 |
| CD3+CD4+%      | 114 | 33.33 ±9.99      | 106 | 32.23 ±8.65      | 0.39 |
| CD3+CD8+       | 114 | 1640.97 ±3843.35 | 106 | 1098.22 ±1865.17 | 0.18 |
| CD3+CD8+%      | 114 | 26.19 ±13.69     | 106 | 23.55 ±12.04     | 0.13 |
| CD4/CD8        | 114 | 1.56 ±0.71       | 106 | 1.64 ±0.73       | 0.39 |
| CD3+/HLA-DR+   | 97  | 763.32 ±3063.82  | 91  | 601.82 ±2006.44  | 0.67 |
| CD3+/HLA-DR+%  | 97  | 15.32 ±68.77     | 91  | 8.45 ±14.89      | 0.33 |
| Treg           | 101 | 93.34 ±66.48     | 92  | 77.24 ±47.5      | 0.05 |
| Treg%          | 101 | 2.42 ±1          | 92  | 2.42 ±1.06       | 0.98 |
| CD3-/CD19+     | 114 | 856.51 ±494.55   | 106 | 797.48 ±473.68   | 0.37 |
| CD3-/CD19+%    | 114 | 23.05 ±9.9       | 106 | 24.54 ±10.08     | 0.27 |
| CD45+          | 114 | 4563.76 ±4843.72 | 106 | 3734.57 ±2726.58 | 0.12 |
| NK             | 114 | 438.22 ±457.16   | 106 | 423.17 ±331.92   | 0.78 |
| NK%            | 114 | 10.14 ±5.94      | 106 | 12.04 ±7.64      | 0.04 |
| CD14+/HLA-DR+  | 97  | 828.09 ±665.23   | 91  | 753.24 ±453.17   | 0.37 |
| CD14+/HLA-DR+% | 97  | 87.91 ±15.05     | 91  | 87.35 ±14.57     | 0.8  |

|               |    |                  |    |                  |      |
|---------------|----|------------------|----|------------------|------|
| CD3+          | 94 | 2480.99 ±2344.52 | 54 | 2690.52 ±2676.08 | 0.63 |
| CD3+%         | 94 | 65.44 ±12.7      | 54 | 66.01 ±10.36     | 0.77 |
| CD3+CD4+      | 94 | 1098.02 ±610.15  | 54 | 1183.16 ±676.25  | 0.45 |
| CD3+CD4+%     | 94 | 33.13 ±9.58      | 54 | 32.77 ±7.47      | 0.8  |
| CD3+CD8+      | 94 | 1144.09 ±1900.14 | 54 | 1191.64 ±1865.78 | 0.88 |
| CD3+CD8+%     | 94 | 25.35 ±12.12     | 54 | 25.8 ±10.53      | 0.82 |
| CD4/CD8       | 94 | 1.56 ±0.92       | 54 | 1.45 ±0.57       | 0.37 |
| CD3+/HLA-DR+  | 79 | 448.26 ±1457.47  | 48 | 855.83 ±2602.05  | 0.32 |
| CD3+/HLA-DR+% | 79 | 7.37 ±12.42      | 48 | 10.72 ±15.49     | 0.21 |
| Treg          | 80 | 72.5 ±44.96      | 49 | 113.65 ±137.57   | 0.05 |
| Treg%         | 80 | 2.3 ±1.32        | 49 | 2.53 ±0.91       | 0.25 |
| CD3-/CD19+    | 94 | 662.37 ±401.72   | 54 | 668.76 ±374.7    | 0.92 |

|                |                |              |                  |              |                  |      |
|----------------|----------------|--------------|------------------|--------------|------------------|------|
|                | CD3-/CD19+%    | 94           | 22.11 ±11        | 54           | 20.86 ±9.21      | 0.46 |
|                | CD45+          | 94           | 3553.38 ±2506.96 | 54           | 3830.01 ±3062.16 | 0.57 |
|                | NK             | 94           | 372.82 ±291.1    | 54           | 416.54 ±370.97   | 0.46 |
|                | NK%            | 94           | 11.32 ±7.14      | 54           | 11.67 ±7.61      | 0.78 |
|                | CD14+/HLA-DR+  | 77           | 1349.43 ±5500.39 | 48           | 666.79 ±462.39   | 0.28 |
|                | CD14+/HLA-DR+% | 77           | 86.42 ±14.87     | 48           | 82.02 ±17.83     | 0.16 |
| 5~6            | CD3+           | 32           | 2841.21 ±3074.45 | 30           | 2308.98 ±2299.4  | 0.44 |
|                | CD3+%          | 32           | 67.92 ±11.29     | 30           | 63.67 ±10.54     | 0.13 |
|                | CD3+CD4+       | 32           | 1044.18 ±575.18  | 30           | 1051.5 ±777.02   | 0.97 |
|                | CD3+CD4+%      | 32           | 30.47 ±9.66      | 30           | 32.88 ±10.35     | 0.35 |
|                | CD3+CD8+       | 32           | 1544.19 ±2633.29 | 30           | 1046.16 ±1942.18 | 0.4  |
|                | CD3+CD8+%      | 32           | 30.27 ±14.39     | 30           | 24.22 ±12.2      | 0.08 |
|                | CD4/CD8        | 32           | 1.18 ±0.51       | 30           | 1.57 ±0.67       | 0.01 |
|                | CD3+/HLA-DR+   | 29           | 700.23 ±2021.58  | 25           | 538.51 ±2002.1   | 0.77 |
|                | CD3+/HLA-DR+%  | 29           | 8.98 ±13.96      | 25           | 7.42 ±14.68      | 0.69 |
|                | Treg           | 29           | 76.98 ±51.33     | 26           | 93.29 ±98.03     | 0.45 |
|                | Treg%          | 29           | 2.31 ±0.89       | 26           | 2.82 ±2.75       | 0.37 |
|                | CD3-/CD19+     | 32           | 562.64 ±284.71   | 30           | 677.96 ±515.16   | 0.29 |
|                | CD3-/CD19+%    | 32           | 18.15 ±7.28      | 30           | 21.69 ±9.15      | 0.1  |
|                | CD45+          | 32           | 3856.43 ±3346.97 | 30           | 3442.91 ±2671.42 | 0.59 |
|                | NK             | 32           | 410.08 ±295.37   | 30           | 399.12 ±353.29   | 0.9  |
|                | NK%            | 32           | 12.66 ±7.22      | 30           | 13.17 ±8.7       | 0.81 |
|                | CD14+/HLA-DR+  | 29           | 660.56 ±462.05   | 25           | 584.24 ±421.32   | 0.53 |
| CD14+/HLA-DR+% | 29             | 84.33 ±17.51 | 25               | 79.26 ±22.24 | 0.36             |      |

CD: caesarean delivery, VD: vaginal delivery, N: Number of participants; CD3+: The number of CD3+ T cells/ $\mu$ l; CD3+%: The ratio of CD3+ T cell in total lymphocyte; CD3+CD4+: The number of CD3+CD4+ T cells/ $\mu$ l; CD3+CD4+%: The ratio of CD3+CD4+ T cell in total lymphocyte; CD3+CD8+: The number of CD3+CD8+ T cells/ $\mu$ l; CD3+CD8+%: The ratio of CD3+CD8+ T cell in total lymphocyte; CD4/CD8: the ratio of CD4+ T cell versus CD8+ T cell; CD3+/HLA-DR+: The number of CD3+/HLA-DR+ T cells/ $\mu$ l; CD3+/HLA-DR+%: The ratio of CD3+/HLA-DR+ T cell in total lymphocyte; Treg: The number of regulatory T cells/ $\mu$ l; Treg%: The ratio of regulatory T cell in total lymphocyte; CD3-/CD19+: The number of B cells/ $\mu$ l; CD3-/CD19+%: The ratio of B cell in total lymphocyte; CD45+: The number of CD45+ cells/ $\mu$ l; NK: The number of NK cells/ $\mu$ l; NK%: The ratio of NK cell in total lymphocyte; CD14+/HLA-DR+: The number of activated monocytes cells/ $\mu$ l; CD14+/HLA-DR+%: The ratio of activated monocytes in total monocytes.

All tests of these cells are done by flow cytometry. The absolute number (cells/ $\mu$ L) of positive cells in the sample can be determined by comparing cellular events to bead events. Absolute counts of cells are calculated by BD FACSCanto clinical software using the following formula: cell population absolute count test volume = (events in cell population/events in absolute count bead region)\*(beads of each test/test volume).
